# Supplementary material for: Analytical methodologies for oxidized organic compounds in the atmosphere
Source: Royal Society of Chemistry journal article supplement (doi:10.1039/d3em00163f), 2023-01-01
Supplement: d3em00163f1.pdf [file d3em00163f1.pdf]

## **Analytical Methodologies for Oxidized Organic Compounds in the Atmosphere**

Aleksi Tiisanen<sup>1</sup>, Jose Ruiz-Jimenez<sup>1,2</sup>, Kari Hartonen<sup>1,2</sup>, Susanne K. Wiedmer<sup>1\*</sup>

<sup>1</sup> Department of Chemistry, P.O. Box 55, FI-00014 University of Helsinki, Finland

<sup>2</sup> Institute for Atmospheric and Earth System Research, Chemistry, Faculty of Science, P.O. Box 55, FI-00014 University of Helsinki, Finland

corresponding author: [susanne.wiedmer@helsinki.fi](mailto:susanne.wiedmer@helsinki.fi)

### **Content**

Figure S1. Isoprene markers of first-generation and higher generation products indicating secondary organic aerosol (SOA) aging formed at low NO<sub>x</sub> concentrations and with different nucleophiles attacking isoprene-epoxydiol.

Figure S2. Isoprene oxidation in higher NO<sub>x</sub> with few significant intermediates and the final product.

Figure S3. Common terpene precursors and their oxidized markers.

Figure S4. Examples of anthropogenic primary compounds or precursors with their oxidized markers.

Figure S5. Proposed reaction mechanism for autoxidation reaction.

Table S1. Common employed reagents for different functional groups.

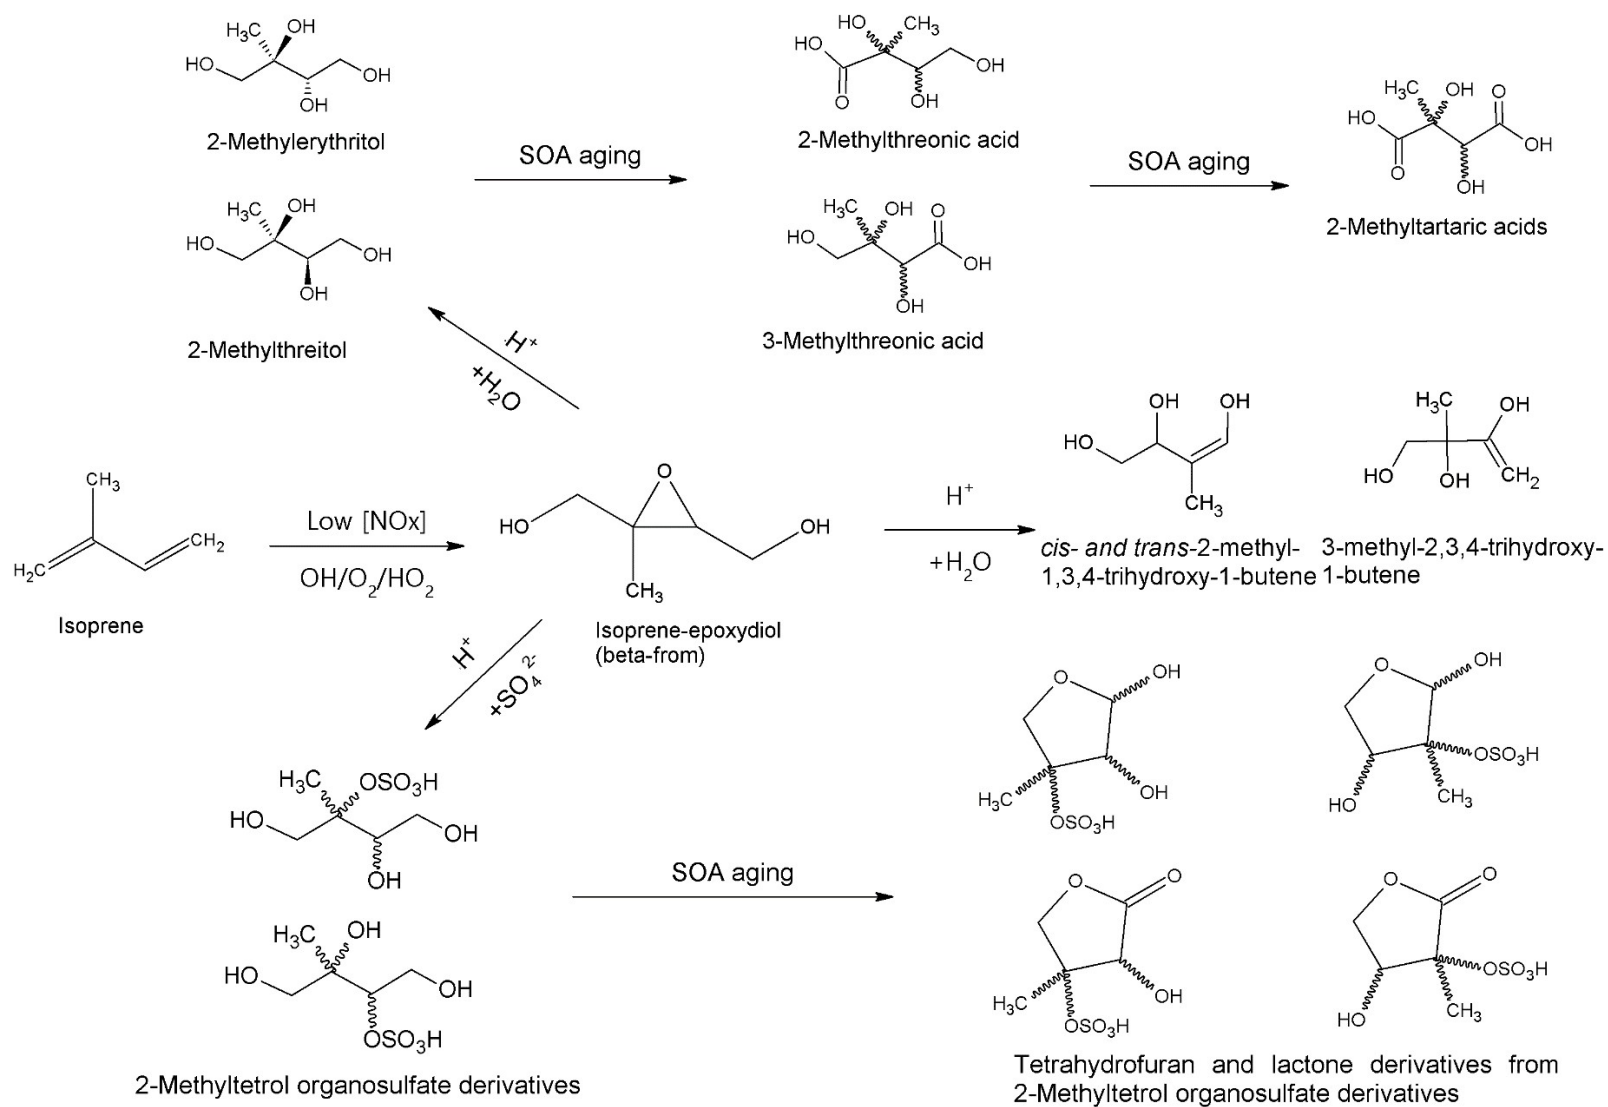

**Figure S1.** Isoprene markers of first-generation and higher generation products indicating secondary organic aerosol (SOA) aging formed at low NOx concentrations and with different nucleophiles attacking isoprene-epoxydiol.

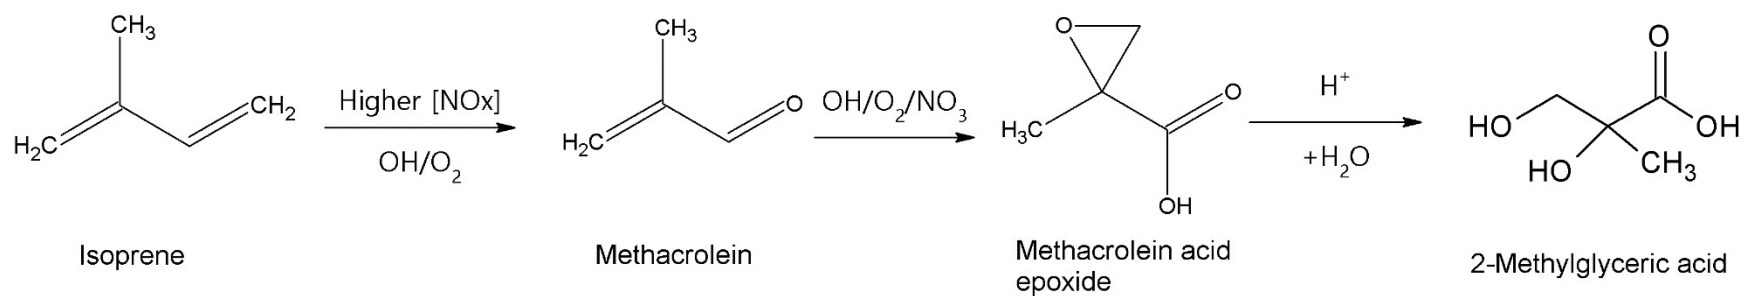

**Figure S2.** Isoprene oxidation in higher NO<sub>x</sub> with few significant intermediates and the final product.

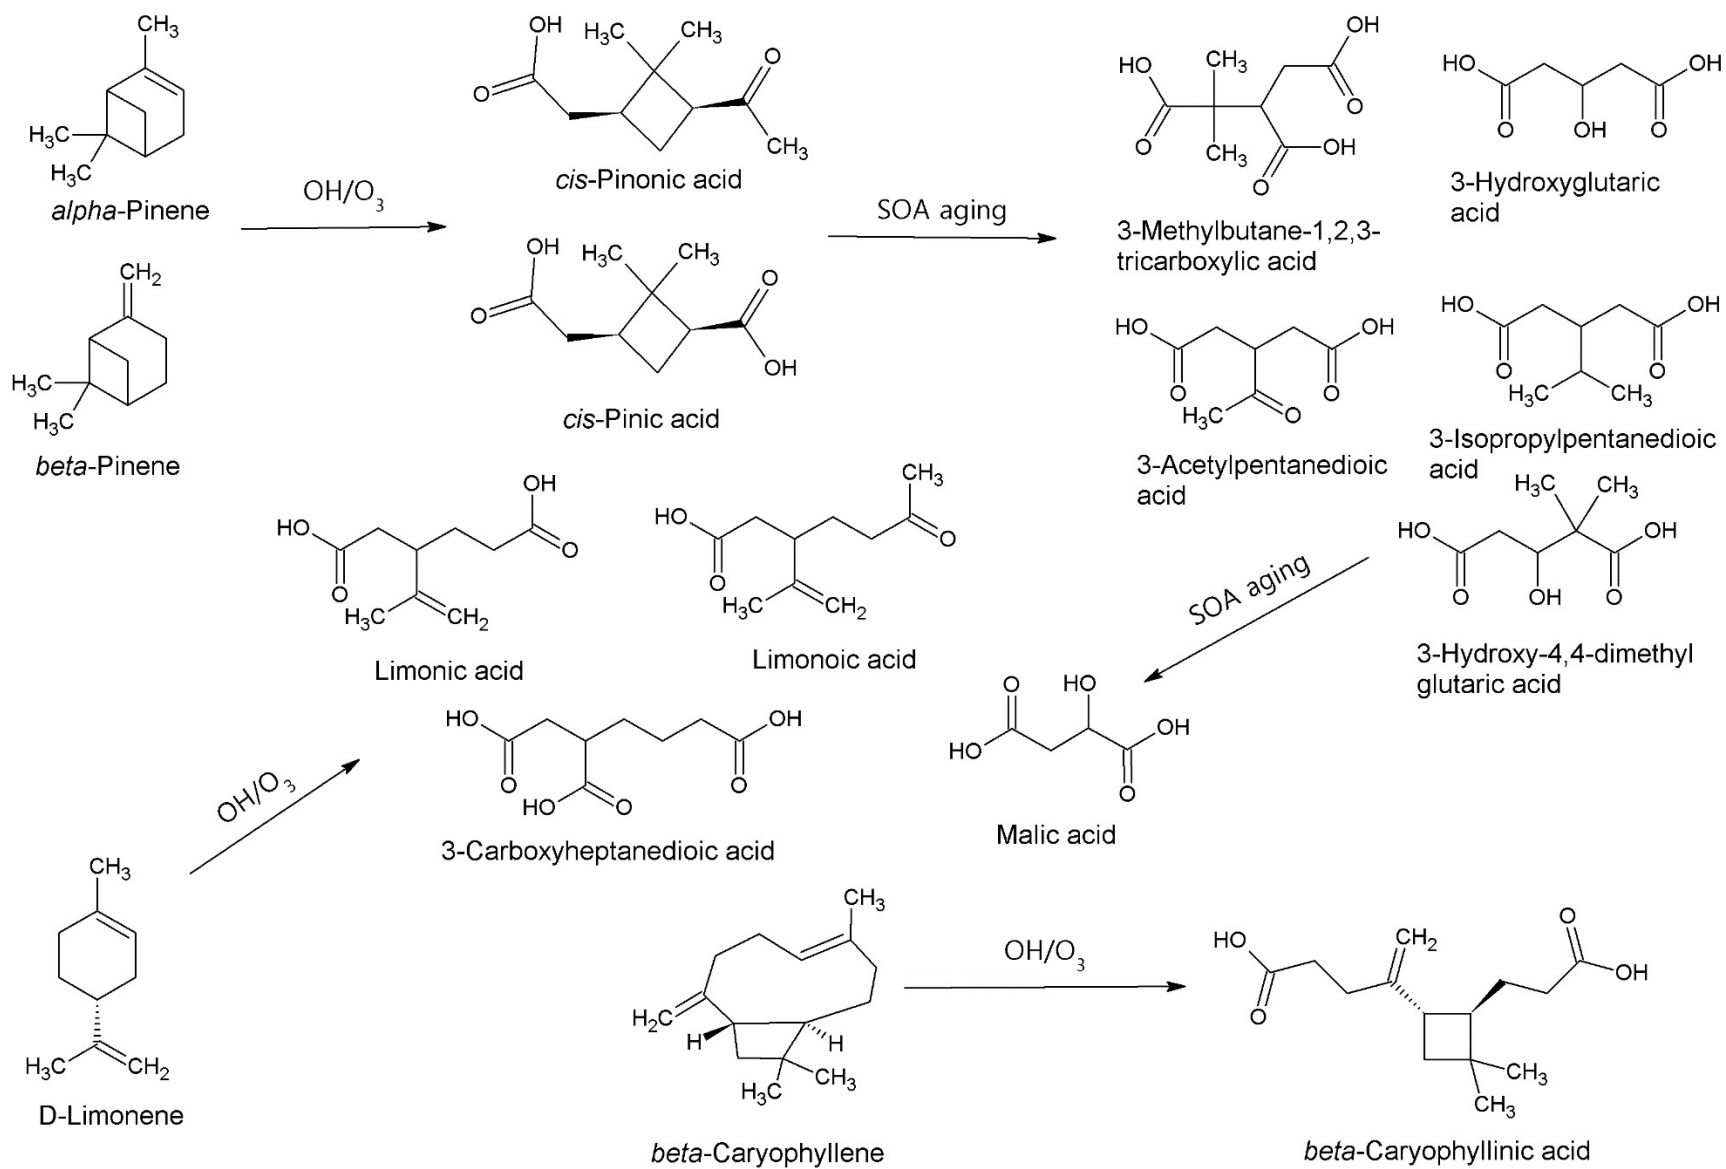

**Figure S3.** Common terpene precursors and their oxidized markers.

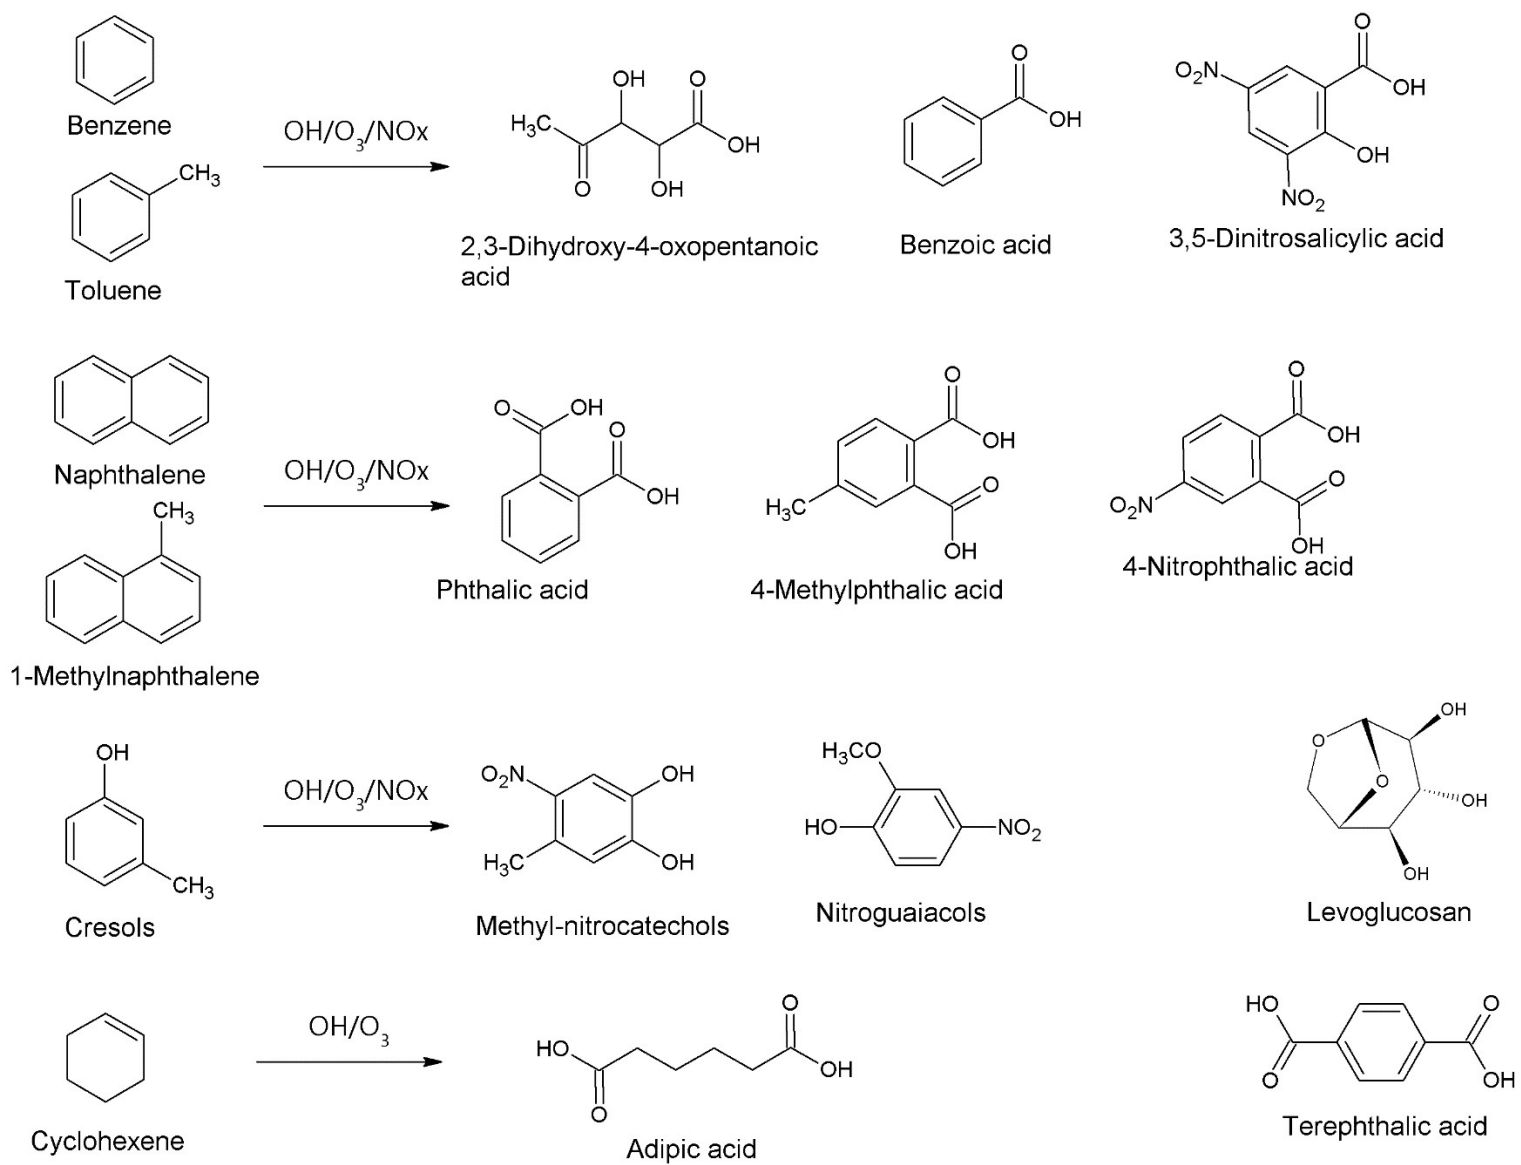

**Figure S4.** Examples of anthropogenic primary compounds or precursors with their oxidized markers.

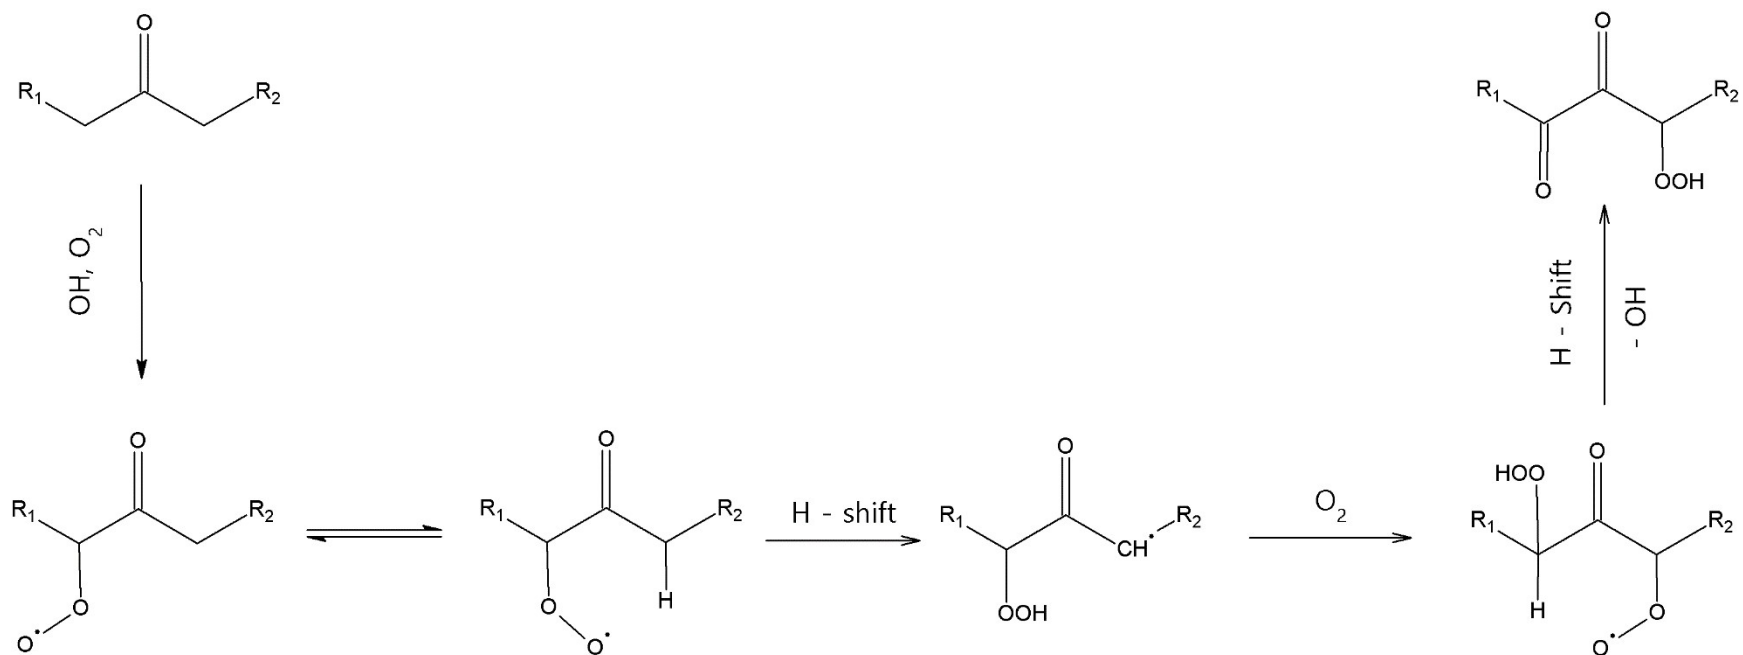

**Figure S5.** Proposed reaction mechanism for autoxidation reaction. Redrawn and modified with permission from ACS Publications. Ref<sup>1</sup>.

**Table S1.** Common employed reagents for different functional groups.

| Reagent                                                                      | Functional Group | Derivative                    | Analysis Technique | References   |
|------------------------------------------------------------------------------|------------------|-------------------------------|--------------------|--------------|
| DNPH <sup>1</sup>                                                            | Carbonyl         | DNPH derivative               | LC                 | 2-4          |
| MHA, <sup>2</sup> BHA, <sup>3</sup><br>TBHA, <sup>4</sup> PFBHA <sup>5</sup> | Carbonyl         | Oximes                        | GC, LC             | 5-10         |
| 14 % Boron trifluoride<br>in butanol                                         | Carbonyl         | Butoxy acetals or<br>ketals   | GC                 | 11-13        |
|                                                                              | Carboxyl         | Butyl esters                  |                    |              |
| TMSD <sup>6</sup> + excess<br>methanol                                       | Carboxyl         | Methyl esters                 | GC                 | 7,8,14       |
| BSTFA <sup>7</sup> or MSTFA <sup>8</sup><br>+ 1 % TMCS <sup>9</sup>          | Carboxyl         | Trimethylsilyl<br>derivatives | GC                 | 7,8,11,14-16 |

- 1 2,4-Dinitrophenylhydrazine  
2 O-methylhydroxylamine  
3 O-benzylhydroxylamine  
4 O-*tert*-butylhydroxylamine  
5 O-(2,3,4,5,6-pentafluorobenzyl)hydroxylamine  
6 Trimethylsilyldiazomethane  
7 N,O-bis(trimethylsilyl) trifluoroacetamide  
8 N-Methyl-N-(trimethylsilyl)trifluoroacetamide  
9 Trimethylchlorosilane

## References

- 1 J. D. Crouse, L. B. Nielsen, S. Jørgensen, H. G. Kjaergaard and P. O. Wennberg, Autoxidation of Organic Compounds in the Atmosphere, *J. Phys. Chem. Lett.*, 2013, **4**, 3513–3520.
- 2 M. C. Prieto-Blanco, Y. Moliner-Martínez, P. López-Mahía and P. Campíns-Falcó, Determination of carbonyl compounds in particulate matter PM<sub>2.5</sub> by in-tube solid-phase microextraction coupled to capillary liquid chromatography/mass spectrometry, *Talanta*, 2013, **115**, 876–880.
- 3 N. N. Naing and H. K. Lee, Determination of glyoxal and methylglyoxal in atmospheric fine particulate matter by vortex-assisted micro-solid phase extraction and liquid chromatography-diode array detection, *J. Chromatogr. A*, 2018, **1573**, 42–47.
- 4 A. Mutzel, L. Poulain, T. Berndt, Y. Iinuma, M. Rodigast, O. Böge, S. Richters, G. Spindler, M. Sipilä, T. Jokinen, M. Kulmala and H. Herrmann, Highly Oxidized Multifunctional Organic Compounds Observed in Tropospheric Particles: A Field and Laboratory Study, *Environ. Sci. Technol.*, 2015, **49**, 7754–7761.
- 5 K. Kawamura, K. Okuzawa, S. G. Aggarwal, H. Irie, Y. Kanaya and Z. Wang, Determination of gaseous and particulate carbonyls (glycolaldehyde, hydroxyacetone, glyoxal, methylglyoxal, nonanal and decanal) in the atmosphere at Mt. Tai, *Atmospheric Chem. Phys.*, 2013, **13**, 5369–5380.
- 6 C. Müller-Tautges, A. Eichler, M. Schwikowski and T. Hoffmann, A new sensitive method for the quantification of glyoxal and methylglyoxal in snow and ice by stir bar sorptive extraction and liquid desorption-HPLC-ESI-MS, *Anal. Bioanal. Chem.*, 2014, **406**, 2525–2532.
- 7 R. M. Flores and P. V. Doskey, Vapor- and aerosol-phase atmospheric organic matter in urban air of the Midwest USA, *Atmos. Environ.*, 2021, **264**, 118705.
- 8 K. Kowalewski and T. Gierczak, Multistep derivatization method for the determination of multifunctional oxidation products from the reaction of  $\alpha$ -pinene with ozone, *J. Chromatogr. A*, 2011, **1218**, 7264–7274.
- 9 J. R. Wells and J. E. Ham, A new agent for derivatizing carbonyl species used to investigate limonene ozonolysis, *Atmos. Environ.*, 2014, **99**, 519–526.
- 10 M. Rodigast, A. Mutzel, Y. Iinuma, S. Haferkorn and H. Herrmann, *Characterisation and optimisation of a method for the detection and quantification of atmospherically relevant carbonyl compounds in aqueous medium*, Aerosols/Laboratory Measurement/Validation and Intercomparisons, 2015.
- 11 D. Gowda and K. Kawamura, Seasonal variations of low molecular weight hydroxy-dicarboxylic acids and oxaloacetic acid in remote marine aerosols from Chichijima Island in the western North Pacific (December 2010–November 2011), *Atmospheric Res.*, 2018, **204**, 128–135.
- 12 D. Gowda, K. Kawamura and E. Tachibana, Identification of hydroxy- and keto-dicarboxylic acids in remote marine aerosols using gas chromatography/quadruple and time-of-flight mass spectrometry, *Rapid Commun. Mass Spectrom.*, 2016, **30**, 992–1000.
- 13 S. Bikkina, K. Kawamura, Y. Sakamoto and J. Hirokawa, Low molecular weight dicarboxylic acids, oxocarboxylic acids and  $\alpha$ -dicarbonyls as ozonolysis products of isoprene: Implication for the gaseous-phase formation of secondary organic aerosols, *Sci. Total Environ.*, 2021, **769**, 144472.
- 14 P. G. Kanellopoulos, E. Chrysochou, K. Koukoulakis, E. Vasileiadou, C. Kizas, C. Savvides and E. Bakeas, Secondary organic aerosol tracers and related polar organic compounds between urban and rural areas in the Eastern Mediterranean region: source apportionment and the



influence of atmospheric oxidants, *Environ. Sci. Process. Impacts*, 2020, 10.1039/D0EM00238K.

15Md. M. Haque, K. Kawamura and Y. Kim, Seasonal variations of biogenic secondary organic aerosol tracers in ambient aerosols from Alaska, *Atmos. Environ.*, 2016, **130**, 95–104.

16M. Jaoui, I. R. Piletic, R. Szmigielski, K. J. Rudzinski, M. Lewandowski, T. P. Riedel and T. E. Kleindienst, Rapid production of highly oxidized molecules in isoprene aerosol via peroxy and alkoxy radical isomerization pathways in low and high NO<sub>x</sub> environments: Combined laboratory, computational and field studies, *Sci. Total Environ.*, 2021, **775**, 145592.
